# Supplementary material
Source: PubMed Central journal article supplement (PMC6451553)
Supplement: ejhpharm-2016-000929supp002.pdf [file ejhpharm-2016-000929supp002.pdf]

## Appendix 2

With kind permission of Centre for Postgraduate Pharmacy Education

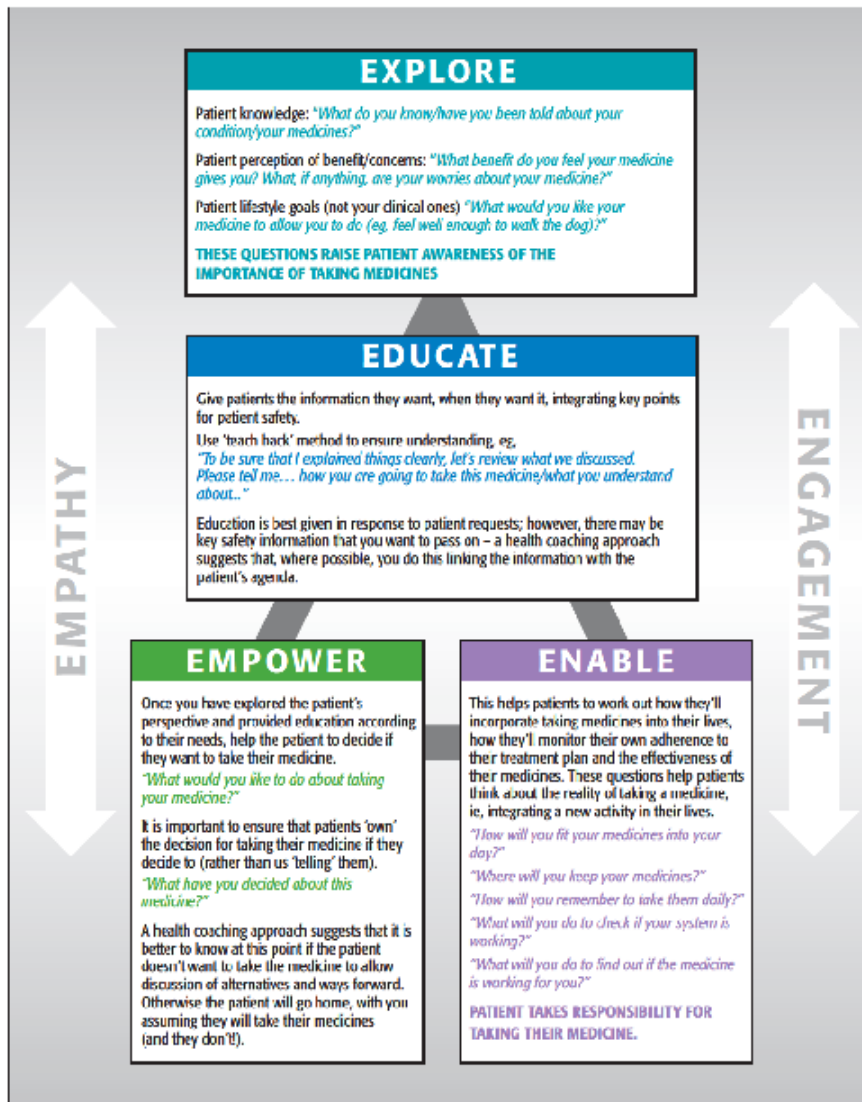

Source: ©Copyright 2013 Nina Bamet. All rights reserved. North West London Hospitals Trust
